# Supplementary material for: WIP1 stimulates migration and invasion of salivary adenoid cystic carcinoma by inducing MMP-9 and VEGF-C
Source: PubMed Central journal article supplement (PMC4496200; doi:10.18632/oncotarget.3320), 2015-03-05
Supplement: oncotarget-06-9031-s001.pdf [file oncotarget-06-9031-s001.pdf]

SUPPLEMENTARY FIGURES

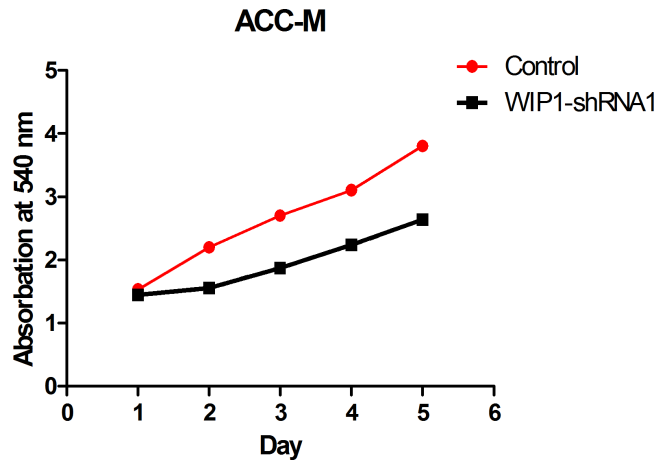

**Supplementary Figure S1: Proliferation of ACC-M cells expressing control and WIP1-shRNA1 were measured using MTT assays.** The results showed that WIP1 silencing decreased the proliferation rate of ACC-M cells slightly compared with control cells ( $p < 0.05$ ).

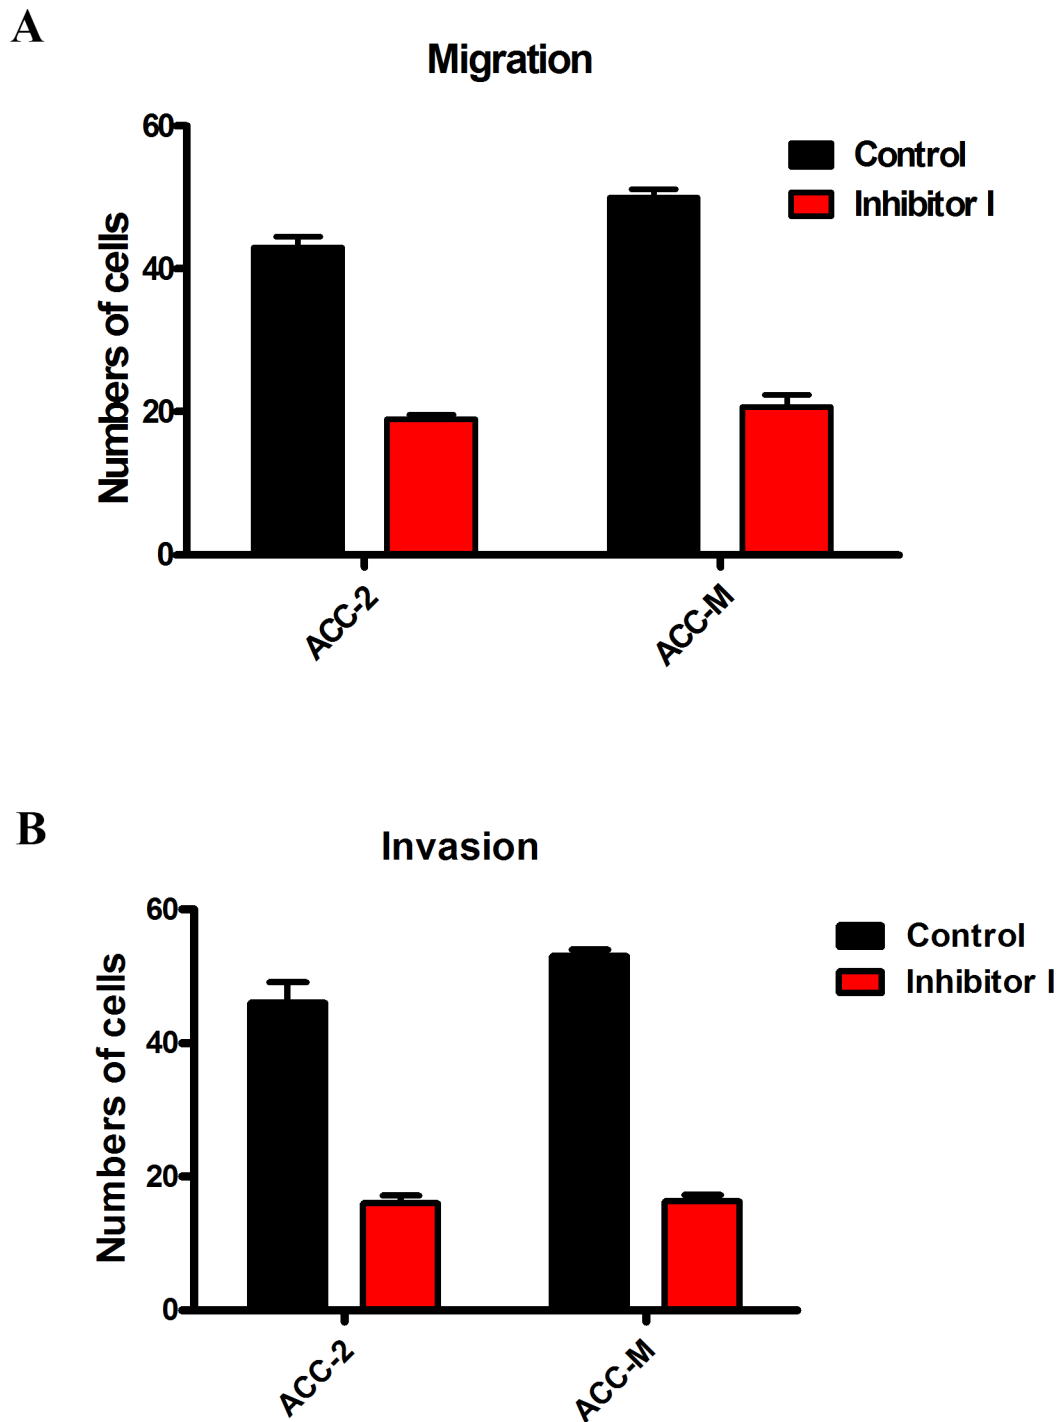

**Supplementary Figure S2: The inhibitor I inhibits ACC-M and ACC-2 cells migration and invasion.** A and B, Migration (A) and invasion (B) assays in ACC-M and ACC-2 cells. The mean was derived from cell counts of 5 fields, and each experiment was repeated 3 times. The result showed that the inhibitor I inhibitors significantly blocked ACC-M and ACC-2 cells migration and invasion ( $p < 0.05$ ).
